# Supplementary material for: A xenogeneic-free system generating functional human gut organoids from pluripotent stem cells
Source: JCI journal article supplement (doi:10.1172/jci.insight.86492), 2017-01-11
Supplement: sd1 [file 1]

**Supplemental Table. List of primers used for quantitative RT-PCR**

| Gene                 | Forward primer (5'→3')     | Reverse primer (3'→5')    |
|----------------------|----------------------------|---------------------------|
| <i>ABCB1</i>         | AAGGCCTAATGCCGAACACA       | GTCTGGCCCTTCTTCACCTC      |
| <i>ABCG2</i>         | TGTGGCATTAAACAGAGAAGAAGAC  | TCACCCCCGGAAGTTGATG       |
| <i>CD34</i>          | AGAAAGGCTGGGCGAAGACCCT     | AGTGGGGAAGGGTTGGGCGT      |
| <i>CDX2</i>          | GGAACCTGTGCGAGTGGAT        | TCGATATTTGTCTTTCGTCCTG    |
| <i>CKIT</i>          | TAAAGGTAACAACAAAGAGCAAATCC | AGGTCAGAATCATCACAATAATGCA |
| <i>CXCR4</i>         | GGGCAATGGATTGGTCATCCT      | TGCAGCCTGTACTTGTCCG       |
| <i>ECAD</i>          | ATTTTTCCTCGACACCCGAT       | TCCCAGGCGTAGACCAAGA       |
| <i>FOXA2</i>         | GGAGCAGCTACTATGCAGAGC      | CGTGTTTCATGCCGTTTCATCC    |
| <i>GATA4</i>         | GTGTCCCAGACGTTCTCAGTC      | GGGAGACGCATAGCCTTGT       |
| <i>GATA6</i>         | GTGCCAACTGTCACACCACA       | GAGTCCACAAGCATTGCACAC     |
| <i>LCT</i>           | TGACCAATCCGAACACGGAG       | CAGAGACCAGGCGACATACC      |
| <i>LGR5</i>          | CACCTCCTACCTAGACCTCAGT     | CGCAAGACGTAACCTCCTCCAG    |
| <i>OCT4</i>          | CGAGGAATTTGCCAAGCTCTGA     | TTCGGGCACTGCAGGAACAAATTC  |
| <i>SLC15A1/PEPT1</i> | CACCTCCTTGAAGAAGATGGCA     | GGGAAGACTGGAAGAGTTTATCG   |
| <i>PGP9.5</i>        | GTCCCCTGAAGACAGAGCAAA      | TTCACCGGAAAAGGCATTCTG     |
| <i>SMA</i>           | TGGCTTGGCTTGTTCAGGGCTT     | CCCGGGGGCTGTAGGACCTT      |
| <i>SOX9</i>          | AGCGAACGCACATCAAGAC        | CTGTAGGCGATCTGTTGGGG      |
| <i>SOX17</i>         | GTGGACCGCACGGAATTTG        | GGAGATTTCACACCGGAGTCA     |
| <i>VIL1</i>          | CGGAAAGCACCCGTATGGAG       | CGTCCACCACGCCTACATAG      |
| <i>Lysozyme</i>      | AAATACTGGGGCCAGCTCAC       | GCCCTGGACCGTAACAGAAA      |
| <i>INS</i>           | CCAGCATCTGCTCCCTCTAC       | TGCTGGTTCAAGGGCTTTAT      |
| <i>ALBUMIN</i>       | CGCTATTAGTTCGTTACACCA      | TTTACAACATTTGCTGCCCA      |
| <i>T</i>             | TATGAGCCTCGAATCCACATAGT    | CCTCGTTCTGATAAGCAGTCAC    |
| <i>SOX1</i>          | ACCAGGCCATGGATGAAG         | CTTAATTGCTGGGGAATTGG      |
| <i>GAPDH</i>         | CTCACCGGATGCACCAATGTT      | CGCGTTGCTCACAATGTTTCAT    |

**Supplemental Figure 1**

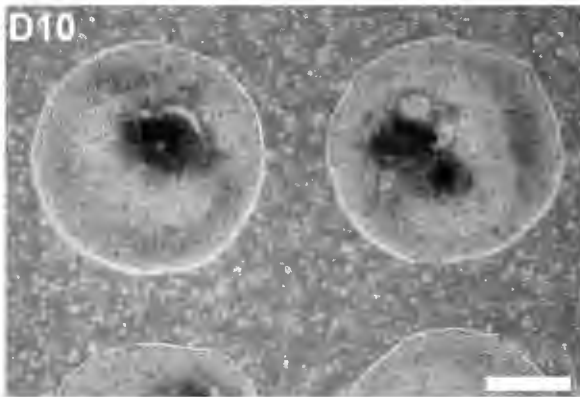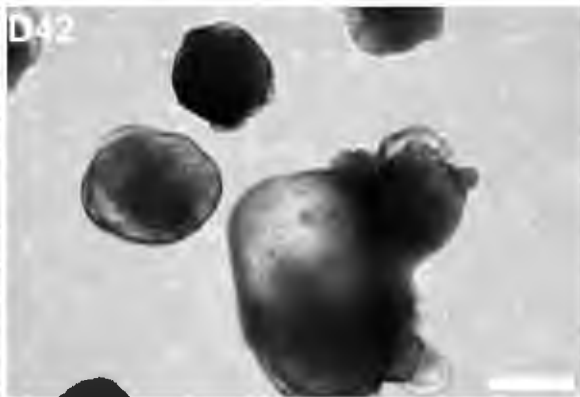

## Supplementary Figure 2

A

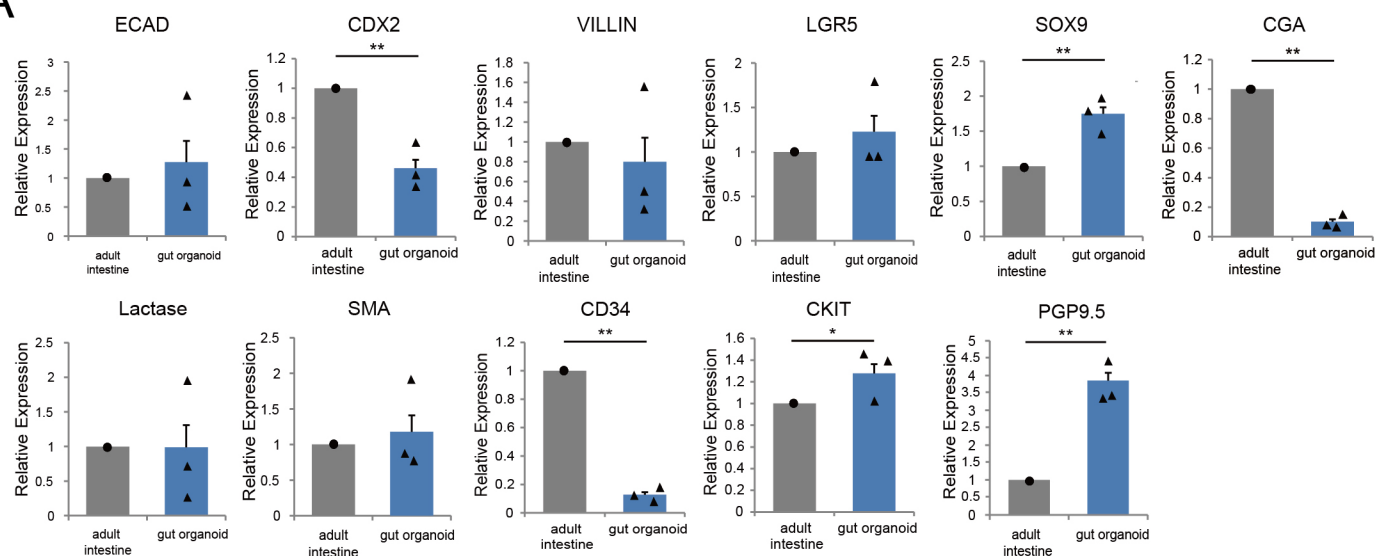

**B**

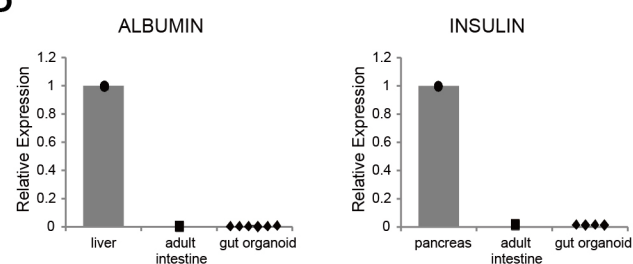

C

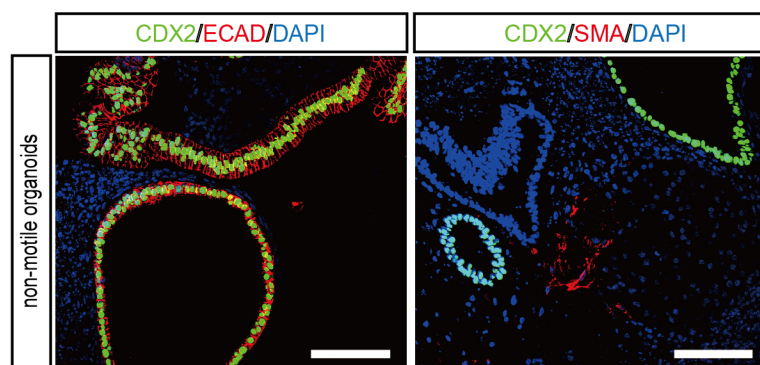

D

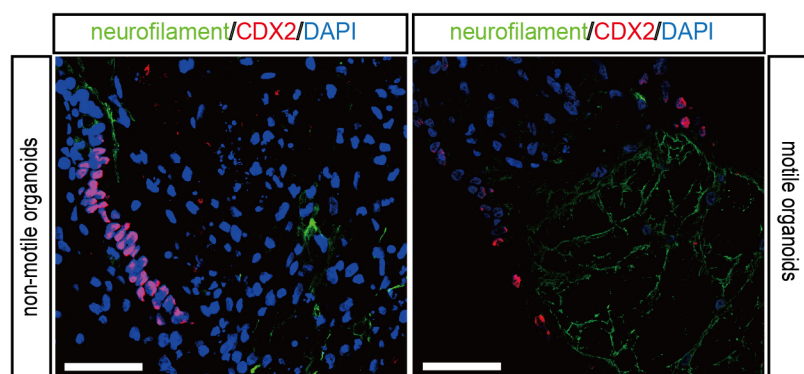

Supplemental Figure 3

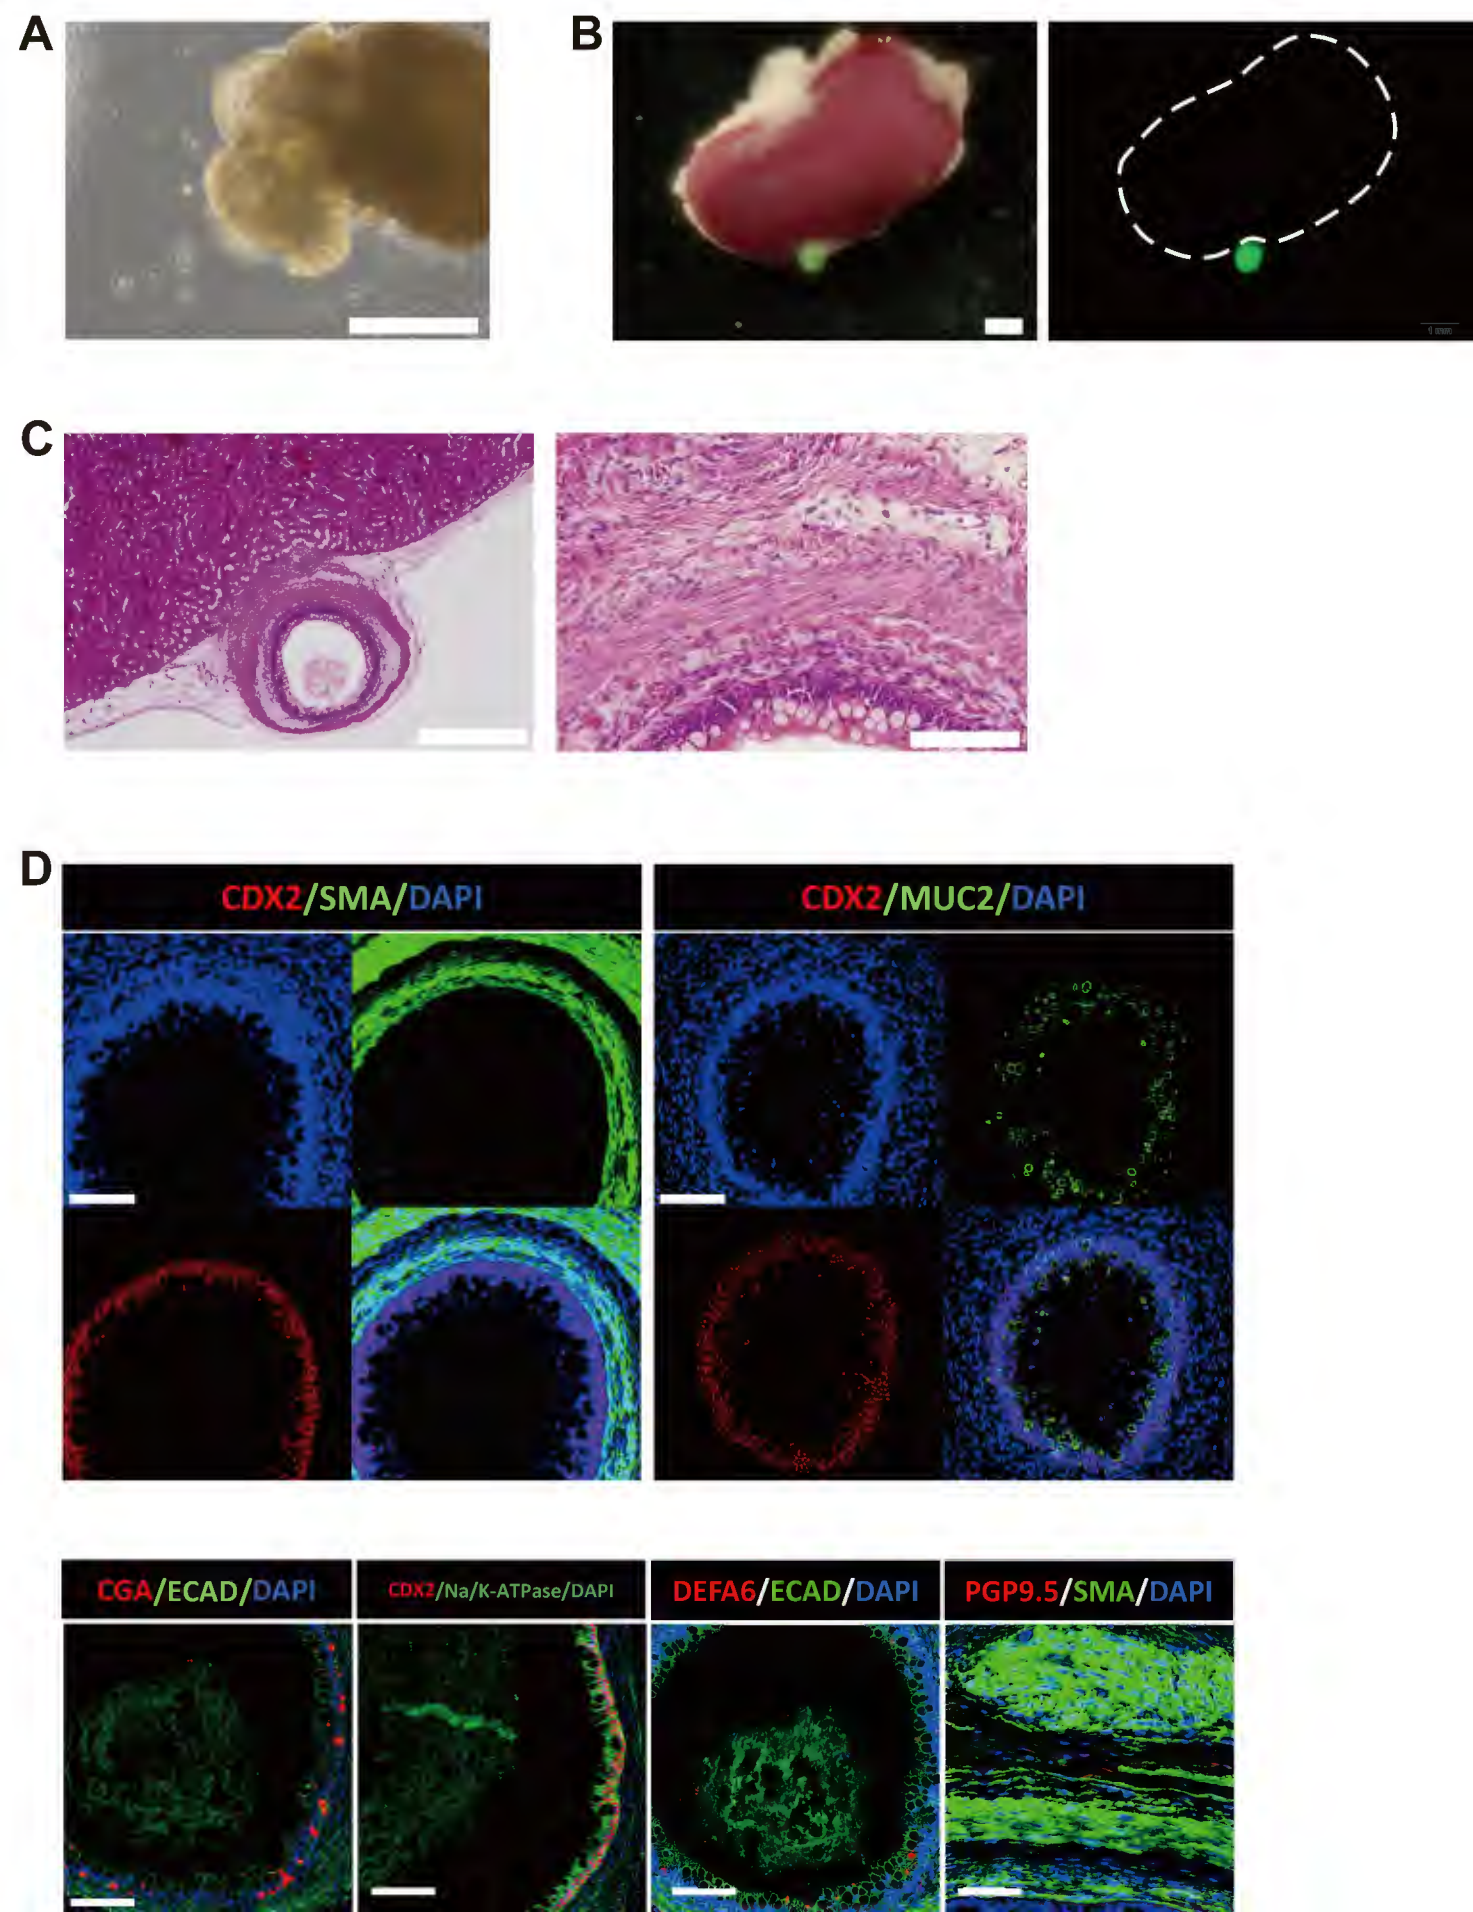

**Supplemental Figure 1. Time course of organoid growth from human iPSCs in**

**culture.** Human induced stem cells (hiPSCs) attached and grew only within each zone at D10. Scale bar: 500  $\mu$ m. (B) The organoids from hiPSCs at D42 are self-organized cystic spheroids. Similarly to hESCs-gut organoids, these belong to simple cystic forms with thin cellular walls; and bi-component spheroids with solid and partially cystic protrusions. Scale bar: 200  $\mu$ m.

**Supplemental Figure 2. Characterization of non-motile gut organoids.** (A) Analysis

of expression of cell biomarkers genes in differentiated non-motile organoids (D52).

Values were normalized against GAPDH. Relative expression of cell biomarker genes in the non-motile organoids and human adult small intestine. Statistical analysis was performed using a t-test or a Mann-Whitney rank sum test (\*  $P < 0.05$ , \*\*  $P < 0.01$ ).

The data are reported as means (%)  $\pm$  SEM from three independent experiments. ( $n = 3$ ).

(B) Non-motile organoids were examined for ALBUMIN and INSULIN expression

levels. Gut organoids showed almost no detectable expression. Single organoids

provided cDNA and three independent samples were prepared. The data were obtained

from three independent experiments. ( $n=3-6$ ). (C) Non-motile organoids immunostained

with markers for CDX2, E-Cadherin (ECAD), and  $\alpha$ -smooth muscle actin (SMA). Cell

nuclei were counterstained with DAPI. Non-motile organoids showed CDX2 and ECAD positive epithelial layers, but a very low level of SMA in the mesenchymal area. Scales bars: 100  $\mu$ m. (D) Non-motile and motile organoids immunostained for neurofilaments and CDX2. Cell nuclei were counterstained with DAPI. Motile organoids showed neuron networks with neurofilaments in the mesenchymal area; however, little evidence of neurofilaments was found in non-motile organoids. Scale bar: 50  $\mu$ m.

**Supplemental Figure 3. Engrafted gut organoids (D35) displayed highly structured intestinal tract morphology.** (A) Single organoids were transplanted under the kidney capsules of adult immunodeficient mice. Scale bar: 200  $\mu$ m. (B) Six weeks after engraftment, the organoid formed a compact EGFP-expressing structure; the size of the engraftment was compared to that of the mouse kidney (dotted white line in the right panel). Scale bars: 1 mm. (C) Hematoxylin and eosin (HE) staining of the engrafted gut organoid; note the lumen and laminated appearance. Scale bars on the left panel: 500  $\mu$ m and on the right panel 100  $\mu$ m. (D) The engrafted organoid developed into a laminated myenteric gut ( $\alpha$ -SMA staining); MUC2 and CDX2 were expressed in the epithelial layer. The distribution of E-cadherin (ECAD) and Na<sup>+</sup>/K<sup>+</sup>-ATPase in highly

differentiated enteroendocrine cells positive for chromogranin A (CGA) and Paneth cells positive for DEFA6 is shown; the expression of enteric neuronal marker PGP9.5 was also observed in the  $\alpha$ -SMA-positive laminated mesenchyme. Scale bars on the upper panel: 100  $\mu$ m and on the lower panel 50  $\mu$ m.

**Supplemental Video 1. Peristalsis-like movements of a D54 hESC-derived organoid**

**in culture.** Organoid contractions were recorded using an inverted microscope. Playback speed, 10 times actual.

**Supplemental Video 2. Modulation of gut organoid contractile activity in culture**

**by pharmacological agents.** hESC-derived contracting gut organoids (D80–90) were treated with peristalsis stimulator histamine (0.2  $\mu$ M) and cholinergic antagonist atropine sulfate (0.2  $\mu$ M), and gut contractility response was recorded using an inverted microscope. Playback speed, 20 times actual.

**Supplemental Video 3. Non-motile gut organoid in culture by histamine**

**administration.** hESC-derived non-motile gut organoids (D80–90) were treated with peristalsis stimulator histamine (0.2  $\mu$ M) and gut contractility response was recorded using an inverted microscope. Playback speed, 16 times actual.

**Supplemental Video 4. Forskolin-induced gut organoid swelling.** Organoids derived from EGFP-SEES1 cells were used to visualize volume changes. Organoid morphology was monitored by time-lapse fluorescence laser confocal microscopy (Keyence) following forskolin treatment. This movie shows time-lapse images of swelling organoid. The time-lapse covers a period of 19 min. Selected frames from this movie are shown in Figure 6B.
